# Supplementary material for: Electron tomographic analysis reveals ultrastructural features of mitochondrial cristae architecture which reflect energetic state and aging
Source: PubMed Central journal article supplement (PMC5371822; doi:10.1038/srep45474), 2017-03-30

1 **Electron tomographic analysis reveals ultrastructural features of mitochondrial**  
2 **cristae architecture which reflect energetic state and aging**

3

4 *Yi-fan Jiang<sup>1,2</sup>, Shao-syuan Lin<sup>1</sup>, Jing-min Chen<sup>1</sup>, Han-zen Tsai<sup>1</sup>, Tao-shih Hsieh<sup>1</sup>,*  
5 *and Chi-yu Fu<sup>1</sup>\**

6 *<sup>1</sup>Institute of Cellular and Organismic Biology, Academia Sinica, Taipei, Taiwan*

7 *<sup>2</sup>Graduate Institute of Molecular and Comparative Pathobiology, School of*

8 *Veterinary Medicine, National Taiwan University, Taipei, Taiwan*

9 \* Corresponding author

10

11 **Supplementary information**

12 **Figure S1. Serial-section electron tomography of a single mitochondrion**

13 (A) 2D micrographs and (B) 3D tomographic slices of serial sections covering an  
14 entire volume of a mitochondrion. (C) The joint serial-section tomograms as viewed  
15 from the z-axis. Of note, material losses during tissue sectioning left gaps between  
16 jointed tomograms.

17

18 **Figure S2. Western-blot analysis of R<sub>WT</sub> and R<sub>MIL</sub>**

19 Western-blot analysis of total protein expression of R<sub>WT</sub> and R<sub>MIL</sub> at week 1, 4, 7.

20

21 **Figure S3. Global disintegration of mitochondrial cristae in aged WT *Drosophila***

22 (A) Immunofluorescent staining of mitochondria at week 4, 7, 10 and 12 showing  
23 larger mitochondria as flies aged. (B) Thin-section EM micrographs of WT IFM at  
24 week 10 and 12 showing mitochondrial cristae swelling, vacuolation and  
25 disintegration. Scale bar 20  $\mu\text{m}$  (A), 0.5  $\mu\text{m}$  (B).

26

27 **Figure S4. Mitochondrial protein content in aged WT *Drosophila***

28 (A) Immuno-EM analysis of ATP synthase, (B) PDHA1 and (C) SOD2 at week 4 and  
29 12. (D) Western-blot analysis of total protein expression at week 4, 7, 10. Scale bar  
30 0.5  $\mu\text{m}$ .

31

32 **Movie S1.** Serial-section electron tomography and segmentation of IFM  
33 mitochondrion showing integrated cristae network in 3D

34

35 **Movie S2.** Serial-section electron tomography and segmentation of IFM  
36 mitochondrion showing bidirectional matrix confluency in 3D

37

38 **Movie S3.** Serial-section electron tomography and segmentation of a mitochondrion  
39 with swirling membranes showing an onion-like core in 3D

40

Fig S1

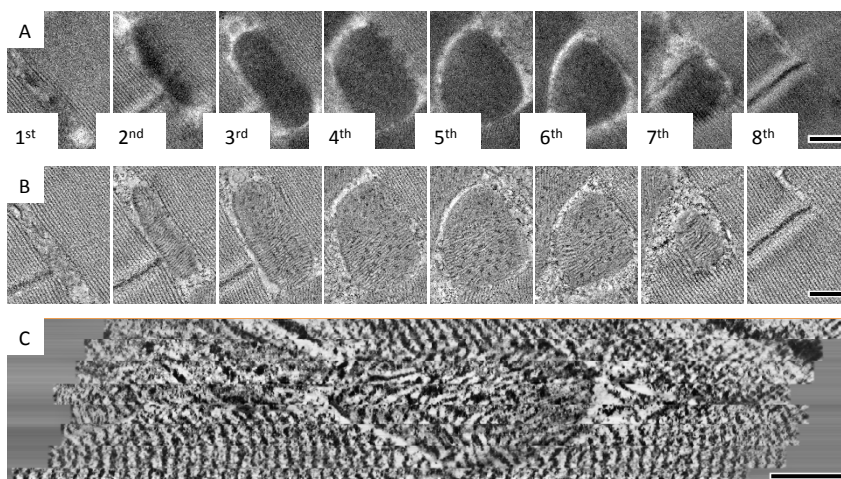

Fig S2

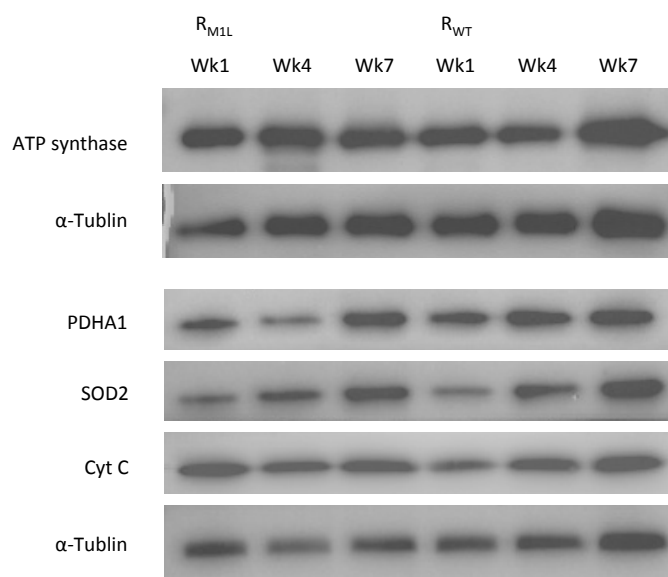

Fig S3

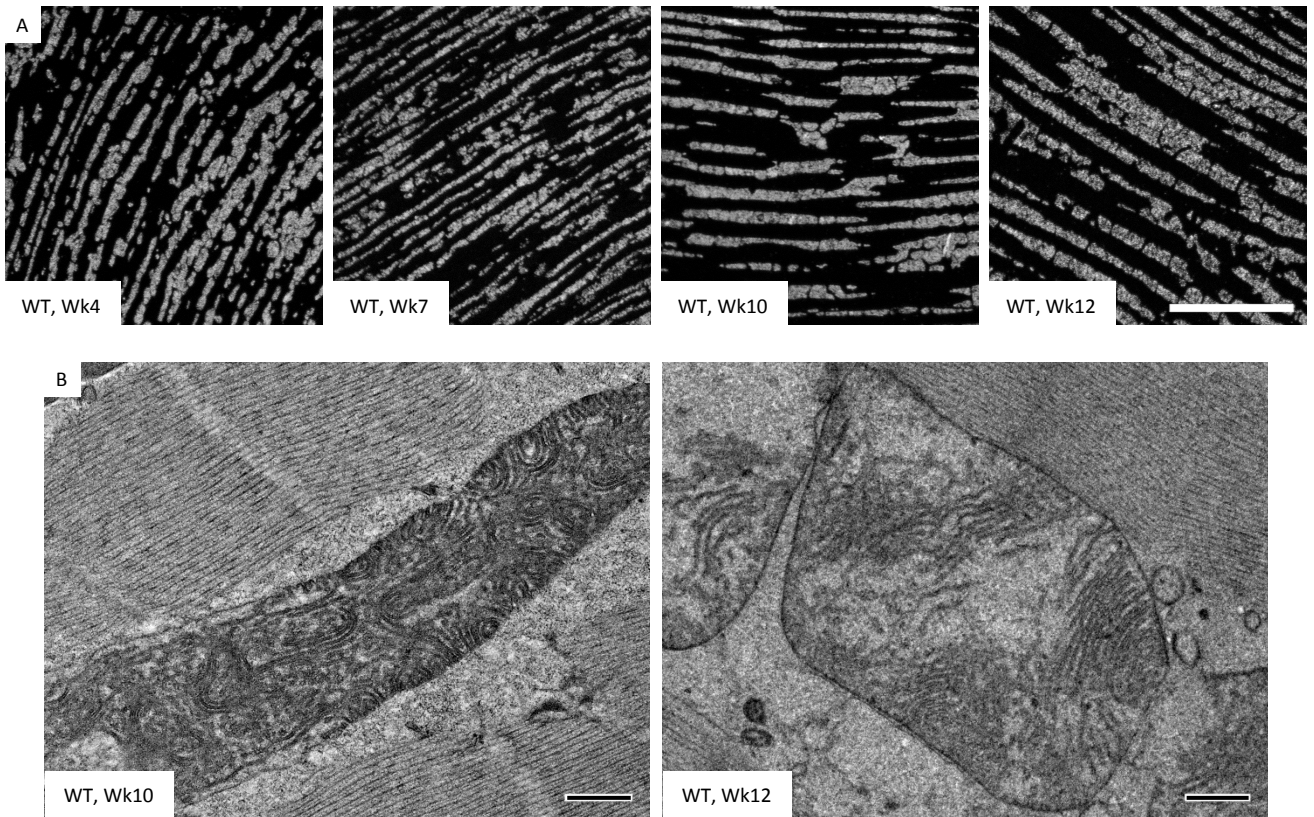

Fig S4

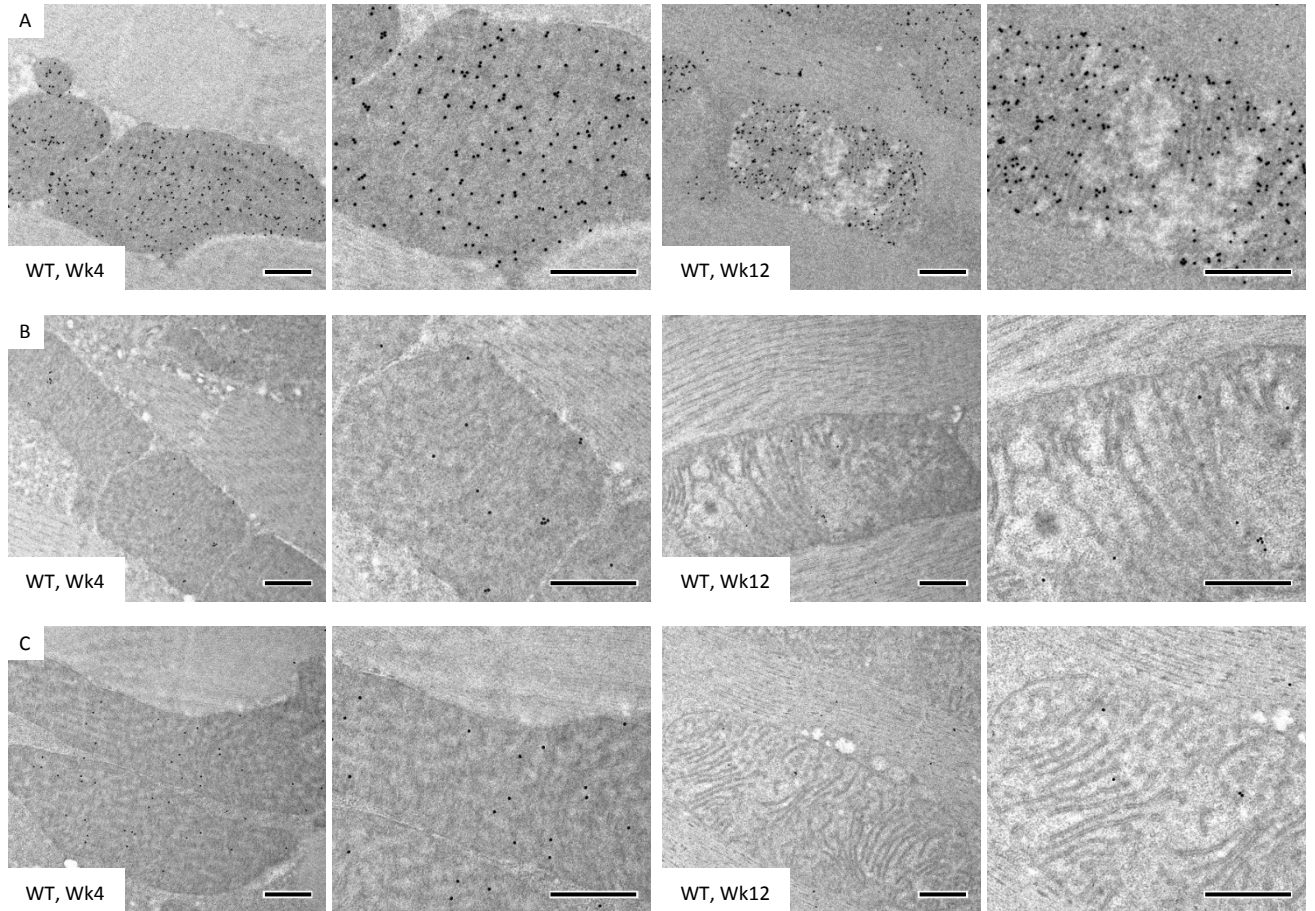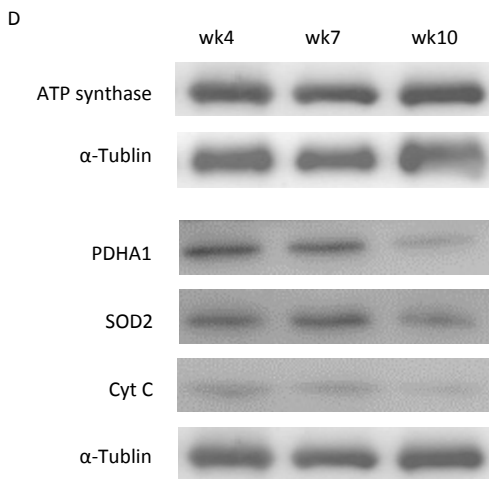

Supplement: srep45474-s1.pdf [file srep45474-s1.pdf]
